# Supplementary material for: Specificity and Efficiency of the Uracil DNA Glycosylase-Mediated Strand Cleavage Surveyed on Large Sequence Libraries
Source: PubMed Central journal article supplement (PMC6883067; doi:10.1038/s41598-019-54044-x), 2019-11-28
Supplement: 41598_2019_54044_MOESM1_ESM.pdf [file 41598_2019_54044_MOESM1_ESM.pdf]

## Supplementary information (SI)

*“Specificity and Efficiency of the Uracil DNA Glycosylase-Mediated Strand Cleavage Surveyed on Large Sequence Libraries”*

Kathrin Hölz<sup>1</sup>, Angelina Pavlic<sup>1</sup>, Jory Lietard<sup>1\*</sup> and Mark M. Somoza<sup>1,2\*</sup>

Email:

\*jory.lietard@univie.ac.at

\*mark.somoza@univie.ac.at

<sup>1</sup>Institute of Inorganic Chemistry, Faculty of Chemistry, University of Vienna, Vienna, Austria

<sup>2</sup>Chair of Food Chemistry and Molecular Sensory Science, Technical University of Munich, Lise-Meitner-Straße 34, 85354 Freising, Germany

## Table of Contents

|                                                  |    |
|--------------------------------------------------|----|
| 1. UDG exposure                                  | S2 |
| 2. UDG sequence dependence                       | S3 |
| 3. List of most-cleaved ss- and dsDNA substrates | S4 |

## Uracil-DNA glycosylase exposure

In order to investigate uracil-DNA glycosylase (UDG) mediated uracil excision from uracil-containing DNA strands on microarray surfaces, microarrays consisting of 10 different 30mer sequences with increasing numbers of non-consecutive dU incorporations ( $dU_1$ - $dU_{10}$ ) were designed as indicated in Figure 3. Each sequence consisted of a  $T_{15}$ -Linker and a random 30mer with an increasing number of dU incorporations, replacing initial dTs, whereas the sequence without any dU incorporation ( $dU_0$ ) served as a control strand. All strands were terminated with a target 25mer sequence (QC25) for hybridization to a Cy3-labelled complementary oligonucleotide (QC25c). The microarrays were incubated with UDG for different time periods ranging from 7 minutes up to 2 hours. After uracil excision, the UDG-generated abasic sites were cleaved chemically by immersing the array into an alkaline solution (EDA/EtOH, 1:1 (v/v)). Subsequently, the array was re-hybridized with a labelled oligonucleotide. The fluorescence intensities were recorded and normalized to that of the control strand. The cleavage efficiency represents the loss of fluorescence intensity after enzymatic exposure.

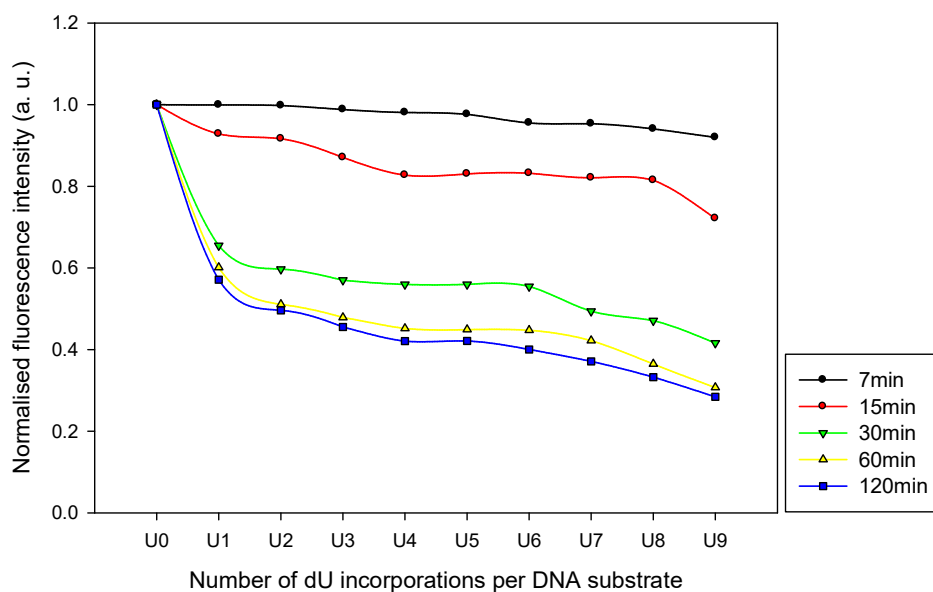

**Figure S1.** Decrease in fluorescence intensity representing the efficiency of UDG-mediated uracil excision and, hence abasic site generation as a function of the number of dU nucleotide incorporations per DNA substrate. The actual cleavage efficiencies correlate with the loss of fluorescence intensity, resulting from DNA substrate cleavage. The arrays were incubated with UDG and the generated abasic sites were subsequently cleaved under alkaline conditions. The decrease in fluorescence intensity was recorded and normalized to that of the control strand ( $U_0$ ). The normalized intensities, indicated in arbitrary units, were plotted over the number of dUs per DNA substrate. UDG incubation was performed for various time periods, indicated with different colors: 7min (*black*), 15min (*red*), 30min (*green*), 60min (*yellow*) and 120min (*blue*).

## Surface degradation upon contact with an acid or a base, or under reduced pressure

In order to estimate the extent by which oligonucleotides synthesized on a microarray are affected by the various treatments (3% trichloroacetic acid in dichloromethane, ethylenediamine/ethanol 1:1 or vacuum) following exposure to UDG, we monitor the cleavage of a DNA control strand without any dU nucleotide (U0, see also Figure 3A). Loss of absolute fluorescence intensity upon treatment followed by re-hybridization correlates with cleavage/degradation of the control DNA strands. The results are shown in Figure S2. There is rapid degradation (loss of fluorescence upon re-hybridization) of the control oligonucleotides under acidic conditions and significant loss of hybridization efficiency if the array left under reduced pressure. On the other hand, if the microarray is treated with a basic solution following UDG exposure, the control oligonucleotides hybridize to their complement with similar efficiency after 2h in EDA (Figure S2, red curve), when the same amount of time in contact with an acid (black curve) or under vacuum (green curve) leads to important loss of hybridization efficiency. Hybridization of U0 after a 4h treatment with EDA is unusually high but shows that EDA-mediated surface degradation is limited. Control oligonucleotides slowly undergo degradation under prolonged exposure to EDA (> 10h).

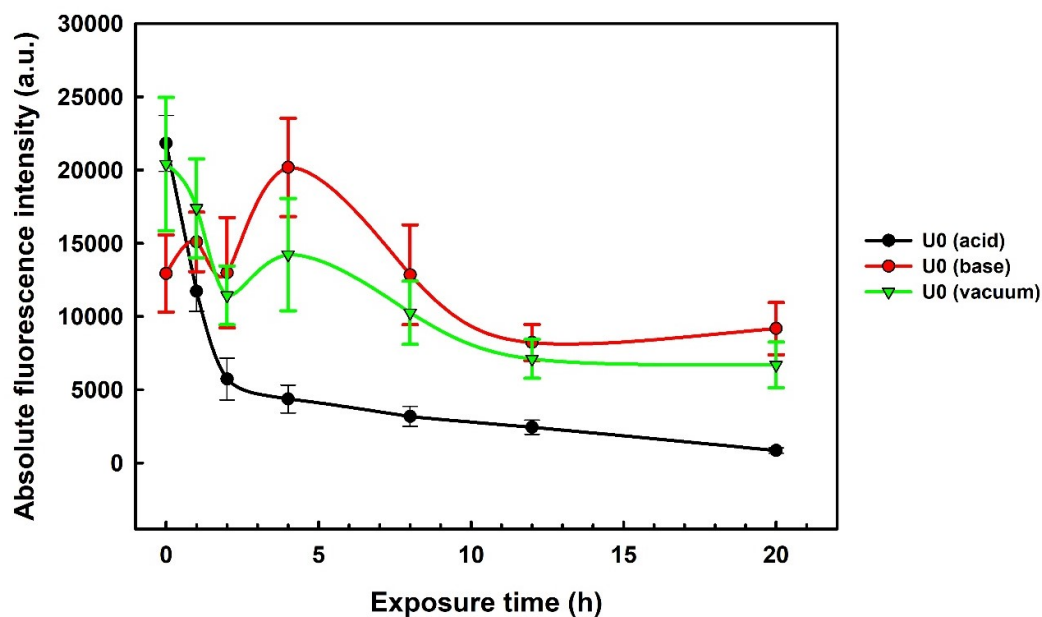

**Figure S2** Absolute fluorescence intensities of a control DNA oligonucleotide with dT replacing dU (U0) hybridized to its Cy3-labelled complementary strand after treatment of the AP-site containing microarray with either: 3% trichloroacetic acid in dichloromethane (acid, black curve), ethylenediamine/ethanol 1:1 (base, red curve) or after drying the surface under reduced pressure (vacuum, green curve). Error bars are SD.

## UDG Sequence dependence

Representative sequence motifs for the UDG-mediated uracil cleavage on double- and single-stranded DNA strands are shown below. Nucleic acid substrates were incubated with UDG for different time periods ranging from 5 seconds to 30 minutes. The sequence motifs were extracted from the 1% (Figure S3, top) and 5% (Figure S3, bottom) of most cleaved and least cleaved sequences of the library.

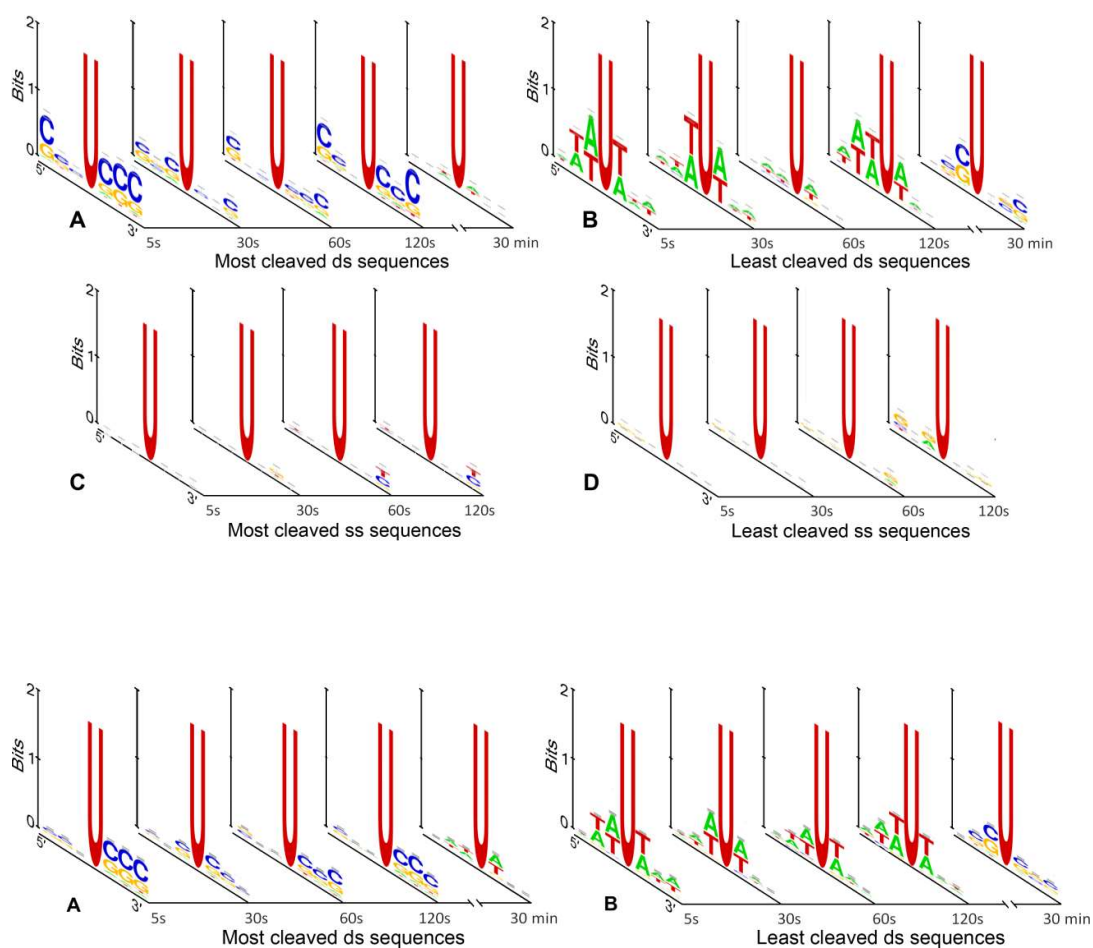

**Figure S3 (Top)** Representative sequence motifs for the 1% (41 of 4096 sequences) of most cleaved (**A** and **C**) and least cleaved (**B** and **D**) sequences of the library on double-stranded (**A** and **B**) single-stranded (**C** and **D**) DNA substrates. **(Bottom)** Representative sequence motifs for the 5% (205 of 4096 sequences) of most cleaved (**A**) and least cleaved (**B**) double-stranded sequences. The equivalent sequence motifs for the 5% most and least cleaved single-stranded DNA substrates show no sequence motif and are not shown.

**Table S1.** List of top 100 most-cleaved substrates in single stranded and double-stranded form after a 2 min incubation with UDG followed by abasic site cleavage under basic conditions, with the corresponding calculated cleavage efficiency. Cleavage efficiency is calculated as the loss of fluorescence intensity after enzymatic treatment, and relative to an uncleavable control. The substrate sequence is shown in the 5' to 3' order and, in the dsDNA form, corresponds to the sequence of the 3' branch.

| ssDNA               |                         | dsDNA               |                         |
|---------------------|-------------------------|---------------------|-------------------------|
| Sequence (5' to 3') | Cleavage efficiency (%) | Sequence (5' to 3') | Cleavage efficiency (%) |
| CATUTCC             | 37.3                    | GAGUGGT             | 39.1                    |
| AAGUATC             | 37.0                    | CTTUCCC             | 39.0                    |
| CAAUAAC             | 35.0                    | GGAUGAG             | 38.8                    |
| CCAUGGT             | 32.2                    | CCCUCCC             | 38.6                    |
| GCCUAAG             | 32.2                    | GCCUCCC             | 38.4                    |
| ACTUAAG             | 31.8                    | CCGUCCC             | 37.8                    |
| ACAUCCA             | 31.5                    | CCTUCCT             | 37.3                    |
| TTTUAAT             | 30.3                    | CCCUCAC             | 37.2                    |
| GTGUTGA             | 29.8                    | GGGUCGG             | 36.9                    |
| CTGUATC             | 29.7                    | CCTUCCC             | 36.8                    |
| GCCUGCA             | 28.3                    | GCTUCCC             | 36.6                    |
| CTAUAGT             | 27.9                    | CCCUTTC             | 36.4                    |
| AAAUCCG             | 27.6                    | CCCUCTC             | 36.4                    |
| AGTUCCT             | 27.1                    | CCCUGCC             | 36.2                    |
| TGAUCCG             | 27.1                    | CACUCCC             | 36.0                    |
| CCGUGCT             | 26.9                    | CGGUCCC             | 35.6                    |
| CTCUGAA             | 26.9                    | GGAUGGG             | 35.6                    |
| ATAUGGG             | 26.5                    | CCTUTTC             | 35.5                    |
| CTTUCCT             | 26.4                    | AGCUCCC             | 35.4                    |
| TTCUATG             | 26.1                    | GAAUGGG             | 35.3                    |
| CGTUAGA             | 26.1                    | CCTUCAC             | 35.3                    |
| CTAUCAC             | 26.0                    | GGGUCAG             | 35.2                    |
| CCCUCCG             | 25.9                    | TCCUCCC             | 35.2                    |
| ACCUCCC             | 25.9                    | GGGUAGG             | 35.2                    |

|         |      |         |      |
|---------|------|---------|------|
| CTCUTTA | 25.8 | GTGUCCC | 35.0 |
| AGCUGCG | 25.6 | CTCUCCC | 34.9 |
| GTAUTCT | 25.5 | GGTUAAG | 34.9 |
| GTCUTTA | 25.4 | CCAUGCC | 34.8 |
| GAGUGTT | 25.2 | TGAUCCC | 34.7 |
| CCTUTAG | 25.1 | GGGUGGA | 34.7 |
| TTCUCGG | 24.6 | CCAUGGG | 34.6 |
| TCTUGCT | 24.6 | CCTUACC | 34.5 |
| CGTUTTT | 24.5 | CCAUCTC | 34.5 |
| CCAUCCC | 24.5 | ACCUCCC | 34.4 |
| GTCUAAC | 24.4 | CCAUTCC | 34.3 |
| TGAUATC | 24.4 | CATUCCC | 34.2 |
| GTTUTTG | 24.3 | CTCUCTC | 34.2 |
| GTGUGCA | 24.3 | CCCUCCT | 34.2 |
| AGAUCTC | 24.2 | CCGUGCC | 33.8 |
| TATUCTC | 24.2 | CAAUCCC | 33.8 |
| GCAUGCT | 24.1 | CTGUCCC | 33.8 |
| AGGUCCT | 24.1 | GGTUCGG | 33.7 |
| GCTUCTT | 23.9 | CCCUCCA | 33.6 |
| GTCUTCT | 23.8 | CGCUCCC | 33.6 |
| ACTUATG | 23.8 | CCCUTCC | 33.6 |
| ACTUAGT | 23.8 | TGGUCCC | 33.5 |
| TTGUGAC | 23.7 | CTCUGCC | 33.5 |
| GAAUTTG | 23.7 | TGTUCCC | 33.4 |
| GTCUCCA | 23.7 | TGGUAGG | 33.4 |
| AATUGTG | 23.6 | CGGUCGG | 33.3 |
| TTTUCTC | 23.6 | ACCUCC  | 33.3 |
| CAAUTGC | 23.6 | GAGUCGG | 33.2 |
| GCCUTCT | 23.5 | CCCUACC | 33.2 |
| TTGUGGG | 23.5 | CACUTCC | 33.2 |
| TAGUTCA | 23.3 | GACUGGT | 33.2 |
| AGCUGAA | 23.3 | TCAUCCC | 33.2 |
| TACUTAA | 23.3 | ACGUCGG | 33.1 |
| AGTUTCT | 23.3 | CTCUCCA | 33.1 |
| AAGUGGT | 23.2 | GCCUTCC | 33.1 |
| ACCUCTC | 23.2 | TGCUTCC | 33.1 |
| ACCUGCC | 23.1 | GGAUCAG | 33.0 |
| TCCUTCC | 23.0 | TGCUCCC | 33.0 |
| CCTUCTC | 22.9 | AGGUCCC | 33.0 |
| TACUGGG | 22.9 | CTAUCCC | 32.9 |
| CCAUCTA | 22.8 | CGCUGCC | 32.9 |
| TCCUTGC | 22.8 | ACCUCTC | 32.9 |
| CTCUATC | 22.8 | AGGUAGG | 32.9 |
| TGTUACA | 22.8 | GCAUCCC | 32.9 |
| ATCUGTT | 22.7 | GGAUCGG | 32.8 |
| TGAUCCA | 22.7 | GGTUAGG | 32.7 |
| TGTUGAC | 22.7 | CTGUGCC | 32.7 |

|         |      |         |      |
|---------|------|---------|------|
| GCCUTCC | 22.6 | CTCUCAC | 32.5 |
| GGGUGCA | 22.6 | GTGUCGG | 32.5 |
| GCAUAAA | 22.5 | GAGUGGA | 32.4 |
| CACUGCC | 22.5 | GGGUCCC | 32.3 |
| CGCUAGC | 22.5 | ATCUCCC | 32.3 |
| TCTUAGT | 22.4 | GGGUGGT | 32.2 |
| ATTUTAC | 22.4 | CCTUCCA | 32.2 |
| ATCUTGA | 22.4 | CGCUTCC | 32.1 |
| AATUTTC | 22.2 | GGTUCAG | 32.1 |
| GATUATC | 22.1 | GACUGAG | 32.0 |
| CACUTAC | 22.1 | CTGUACC | 32.0 |
| CCCUTAA | 22.1 | GAGUCAG | 31.9 |
| GAGUCGT | 22.0 | GACUCGG | 31.9 |
| CTAUTTT | 22.0 | ACAUGGG | 31.9 |
| GCCUATC | 22.0 | CTGUCCA | 31.8 |
| CGCUCGC | 22.0 | TCTUCCC | 31.8 |
| AGTUACC | 21.9 | ACTUCCC | 31.7 |
| CTAUGAT | 21.9 | CGCUCCA | 31.7 |
| TACUCCC | 21.8 | GGCUCCC | 31.7 |
| AGTUAAA | 21.8 | CAGUCCC | 31.7 |
| GTCUTAA | 21.8 | TGGUGGA | 31.7 |
| TAGUACT | 21.8 | AGGUCGG | 31.6 |
| CTCUATG | 21.8 | GCCUCGG | 31.6 |
| ACTUCTG | 21.8 | GATUAGG | 31.5 |
| GTTUTGG | 21.7 | GTGUGGA | 31.5 |
| TCTUGTT | 21.7 | CCGUCGG | 31.5 |
| CCTUGAA | 21.7 | CTCUCCT | 31.5 |
| CCTUAGT | 21.7 | AAAUCCC | 31.4 |
| GTGUGCT | 21.7 | TTTUCCC | 31.4 |
